# Supplementary material
Source: publisher site journal article supplement (https://www.degruyterbrill.com/publication/isbn/9783110302011/downloadAsset/9783110302011_Inhaltsverzeichnis.pdf)
Supplement: Supplementary file 1 [file 9783110302011_Inhaltsverzeichnis.pdf]

# Inhaltsverzeichnis

|                                                                             |     |
|-----------------------------------------------------------------------------|-----|
| <b>Vorwort</b>                                                              | v   |
| <b>1 Biologie und Chemie des Kochens</b>                                    | 1   |
| 1.1 Was beim Garen geschieht . . . . .                                      | 2   |
| 1.2 Gemüse . . . . .                                                        | 2   |
| 1.3 Fleisch . . . . .                                                       | 5   |
| 1.4 Spaghetti kochen – Erhitzen von Stärke . . . . .                        | 9   |
| 1.5 Garverfahren . . . . .                                                  | 11  |
| <b>2 Wasser und Dampf – Kochen im Schnellkochtopf</b>                       | 13  |
| 2.1 Die Erfindung des Schnellkochtopfs . . . . .                            | 14  |
| 2.2 Zustände thermodynamischer Systeme . . . . .                            | 17  |
| 2.3 Phasenänderungen beim Erhitzen von Wasser . . . . .                     | 21  |
| 2.4 $v$ - $T$ -Diagramm und Verdampfungsenthalpie . . . . .                 | 24  |
| 2.5 Sieden bei höherem Druck . . . . .                                      | 26  |
| 2.6 Kochen im Schnellkochtopf . . . . .                                     | 33  |
| <b>3 Phasenübergänge in der Natur – Dampf, Tau und Nebel</b>                | 47  |
| 3.1 Geysire . . . . .                                                       | 48  |
| 3.2 Gasgemische . . . . .                                                   | 58  |
| 3.3 Verdampfen und Verdunsten . . . . .                                     | 61  |
| 3.4 Kochen im Gebirge . . . . .                                             | 65  |
| 3.5 Luftfeuchtigkeit . . . . .                                              | 67  |
| 3.6 Taubildung und Taupunkttemperatur . . . . .                             | 70  |
| 3.7 Nebel und Wolken . . . . .                                              | 76  |
| <b>4 Das ideale Gas – Cornelis Drebbels Wunderapparatur</b>                 | 79  |
| 4.1 Der Apparat von Cornelis Drebbel . . . . .                              | 80  |
| 4.2 Die Zustandsgleichung des idealen Gases . . . . .                       | 84  |
| 4.3 Drebbels Apparat als Barometer und Thermometer . . . . .                | 88  |
| <b>5 Fundamentale Konzepte: Kinetische Gastheorie</b>                       | 97  |
| 5.1 Die Begründung der Thermodynamik aus der klassischen Mechanik . . . . . | 98  |
| 5.2 Mikroskopisches Modell des idealen Gases . . . . .                      | 99  |
| 5.3 Statistische Beschreibung des Drucks . . . . .                          | 100 |
| 5.4 Zustandsgleichung des idealen Gases . . . . .                           | 104 |
| 5.5 Maxwell-Boltzmann-Verteilung . . . . .                                  | 110 |

|          |                                                                   |            |
|----------|-------------------------------------------------------------------|------------|
| 5.6      | Luft, statistisch betrachtet . . . . .                            | 116        |
| 5.7      | Brownsche Bewegung . . . . .                                      | 121        |
| 5.8      | Reale Gase . . . . .                                              | 127        |
| <b>6</b> | <b>Der erste Hauptsatz – Thermodynamik des Backofens</b>          | <b>129</b> |
| 6.1      | Der Sonntagsbraten als thermodynamisches Problem . . . . .        | 130        |
| 6.2      | Systemgrenzen . . . . .                                           | 132        |
| 6.3      | Energieformen . . . . .                                           | 134        |
| 6.4      | Innere Energie . . . . .                                          | 135        |
| 6.5      | Gesamtenergie . . . . .                                           | 137        |
| 6.6      | Wärme und Arbeit . . . . .                                        | 138        |
| 6.7      | Der erste Hauptsatz der Thermodynamik . . . . .                   | 148        |
| 6.8      | Spezifische Wärmekapazität . . . . .                              | 152        |
| 6.9      | Spezifische Wärmekapazität von Gasen . . . . .                    | 158        |
| 6.10     | $c_V$ , $c_p$ und die Mathematik des ersten Hauptsatzes . . . . . | 158        |
| 6.11     | Wärmekapazitäten und der Gleichverteilungssatz . . . . .          | 163        |
| 6.12     | Modelle für Festkörper und Flüssigkeiten . . . . .                | 168        |
| 6.13     | Isobare Prozesse und die Enthalpie . . . . .                      | 171        |
| 6.14     | Erster Hauptsatz für stationäre Fließprozesse . . . . .           | 173        |
| <b>7</b> | <b>Adiabatische Prozesse – Luftdruck, Thermik und Wolken</b>      | <b>179</b> |
| 7.1      | Die barometrische Höhenformel . . . . .                           | 180        |
| 7.2      | Temperaturmessungen mit Radiosonden . . . . .                     | 186        |
| 7.3      | Thermik . . . . .                                                 | 190        |
| 7.4      | Der adiabatisch-reversible Prozess . . . . .                      | 195        |
| 7.5      | Der Aufstieg eines Luftpaketes . . . . .                          | 198        |
| 7.6      | Thermik und Temperaturkurve . . . . .                             | 200        |
| 7.7      | Feuchtadiabatischer Aufstieg . . . . .                            | 202        |
| 7.8      | Wolkenbildung . . . . .                                           | 203        |
| 7.9      | Höhenabhängigkeit der Taupunkttemperatur . . . . .                | 207        |
| <b>8</b> | <b>Thermodynamische Kreisprozesse – Heizen mit Wärmepumpen</b>    | <b>209</b> |
| 8.1      | Klimawandel und CO <sub>2</sub> -Emissionen . . . . .             | 210        |
| 8.2      | Mit kalter Luft heizen? . . . . .                                 | 212        |
| 8.3      | Die Carnot-Wärmepumpe . . . . .                                   | 215        |
| 8.4      | Leistungszahl von Wärmepumpen . . . . .                           | 224        |
| 8.5      | Die Carnot-Wärmekraftmaschine . . . . .                           | 227        |
| 8.6      | Wärmepumpen zur Wohnungsheizung . . . . .                         | 228        |
| 8.7      | Leistungszahlen in der Praxis . . . . .                           | 230        |
| 8.8      | Primärenergiebilanz von Wärmepumpen . . . . .                     | 231        |
| 8.9      | Der Kältemittelkreislauf in einer Wärmepumpe . . . . .            | 232        |
| 8.10     | Kältemittel . . . . .                                             | 236        |
| 8.11     | Quantitative Analyse des Kältemittelkreislaufs . . . . .          | 237        |

|           |                                                                   |            |
|-----------|-------------------------------------------------------------------|------------|
| <b>9</b>  | <b>Fundamentale Konzepte: Die Entropie als Zustandsgröße</b>      | <b>241</b> |
| 9.1       | Die Qualität der Energie . . . . .                                | 242        |
| 9.2       | Die Entropie der inkompressiblen Substanz . . . . .               | 245        |
| 9.3       | Adiabatische Erreichbarkeit als Ordnungsrelation . . . . .        | 248        |
| 9.4       | Die Entropie . . . . .                                            | 254        |
| 9.5       | Die Entropie des idealen Gases . . . . .                          | 257        |
| 9.6       | Unterirdische Verbindungen . . . . .                              | 260        |
| <b>10</b> | <b>Fundamentale Konzepte: Der zweite Hauptsatz</b>                | <b>267</b> |
| 10.1      | Irreversible Prozesse . . . . .                                   | 268        |
| 10.2      | Bilanzgleichung für die Entropie . . . . .                        | 269        |
| 10.3      | Der zweite Hauptsatz der Thermodynamik . . . . .                  | 275        |
| 10.4      | Entropieerzeugung in irreversiblen Prozessen . . . . .            | 278        |
| 10.5      | Das Maximum der Entropie . . . . .                                | 280        |
| 10.6      | Freie Energie und freie Enthalpie . . . . .                       | 281        |
| 10.7      | Klassische Fassungen des zweiten Hauptsatzes . . . . .            | 285        |
| 10.8      | Entropiebilanz für offene Systeme . . . . .                       | 291        |
| <b>11</b> | <b>Fundamentale Konzepte: Mikroskopische Deutung der Entropie</b> | <b>295</b> |
| 11.1      | Irreversibilität und die Zerstreuung von Energie . . . . .        | 296        |
| 11.2      | Makrozustand und Mikrozustände . . . . .                          | 298        |
| 11.3      | Statistische Mechanik: Das Zählen von Zuständen . . . . .         | 299        |
| 11.4      | Das Boltzmann-Einstein-Modell . . . . .                           | 300        |
| 11.5      | Die Verbindung zur Thermodynamik . . . . .                        | 304        |
| 11.6      | Die Boltzmann-Verteilung . . . . .                                | 307        |
| 11.7      | Mikroskopische Begründung der Irreversibilität . . . . .          | 312        |
| <b>12</b> | <b>Kraftwerksprozesse – Strom von der Sonne</b>                   | <b>315</b> |
| 12.1      | Solkraftwerke in der Wüste . . . . .                              | 316        |
| 12.2      | Grundaufbau eines solarthermischen Kraftwerks . . . . .           | 322        |
| 12.3      | Der Kraftwerksprozess . . . . .                                   | 324        |
| 12.4      | Gas-und-Dampf-Kraftwerke . . . . .                                | 333        |
| 12.5      | Kraft-Wärme-Kopplung . . . . .                                    | 334        |
| <b>13</b> | <b>Mechanismen der Wärmeübertragung – Windchill</b>               | <b>335</b> |
| 13.1      | Windchillmessungen in der Antarktis . . . . .                     | 336        |
| 13.2      | Die Mechanismen der Wärmeübertragung . . . . .                    | 342        |
| 13.3      | Wärmeleitung . . . . .                                            | 343        |
| 13.4      | Wärmeübertragung durch Strahlung . . . . .                        | 347        |
| 13.5      | Wärmeübertragung durch Konvektion . . . . .                       | 360        |
| 13.6      | Der Behälter von Siple und Passel . . . . .                       | 369        |
| 13.7      | Thermische Netzwerke . . . . .                                    | 375        |

|           |                                                              |     |
|-----------|--------------------------------------------------------------|-----|
| <b>14</b> | <b>Instationäre Wärmeleitung – Das perfekte Frühstücksei</b> | 379 |
| 14.1      | Die Wärmeleitungsgleichung . . . . .                         | 380 |
| 14.2      | Die gleichmäßige Erwärmung . . . . .                         | 382 |
| 14.3      | Morgen bringe ich sie um ... . . . .                         | 386 |
| 14.4      | Warum sich Metall kalt und Holz warm anfühlt . . . . .       | 393 |
| <b>A</b>  | <b>Literatur und Bildnachweis</b>                            | 401 |
| <b>B</b>  | <b>Tabellen und Symbolverzeichnis</b>                        | 409 |
|           | Sachregister                                                 | 425 |
